# Supplementary material
Source: publisher site journal article supplement (https://www.spandidos-publications.com/2442/downloadSupplementary)
Supplement: Supplementary file 1 [file downloadSupplementary]

## Sheet: Supp table 2
Table SII. Therapy on blood collection date.
Treatment during blood sample collection	Patient no.
Cabozantinib	11
Cabozantinib/atezolizumab	9
Cabozantinib/nivolumab	1
Savolitinib	2
Nivolumab	9
Atezolizumab	4
Nivolumab/ipilimumab	4
Lenvatinib/everolimus	4
Axitinib/avelumab	1
Sunitinib	2
Tivozanib	1
Axitinib	1
